# Supplementary material
Source: PubMed Central journal article supplement (PMC5446588)

## Single pellet model – MATLAB code

```

%Everything is in SI units"
function Single_pellet_model
clear all

%Initial geometry
R0=300E-6; Rb0=300E-6+6E-6; Ra0=Rb0-2E-9; Rc0=Rb0+30E-6;

%Dissolution Time [s]
TIME=80*3600;
%Densities [kg/m^3]
rho10=1000; rho20=1200; rho30=1200; rho40=1200;

%Diffusivities [m^2/s]
D2b=1.5E-10; % from doi:10.1016/j.ijpharm.2015.03.054
D1b=2.2E-9; % from doi:10.1016/j.ijpharm.2015.03.054
D2c=2*3.2E-13; % from Kazlauske et al. (submitted)
D1c=1.99E-12; % from Kazlauske et al. (submitted)
D2d=8.21E-10; % from doi:10.1016/S0168-3659(01)00424-2
D1self=3E-9; % from doi:10.1039/B005319H
%See the Transport coefficients definition

%Initial mass fractions
%Domain A
w2sat=0.0115; % from doi:10.1002/jps.2600740209
w2a0=0.9; w3a0=1-w2a0;
%Domain B
w2b0=0;
w3b0=0;
%Domain C
w4c0=1;
w2c0=0;
rho0=((1-w2c0-w4c0)/rho10+w2c0/rho20+w4c0/rho40)^(-1);
%Domain D
w2d0=0; %w1d0=1-w2d0;

Omegad0=1E-3; % Initial dissolution medium [m^3]
Np=5000; % Total number of pellets

function dy = odesystem (t,y)
dy=zeros(9,1); %Initialization

Ra=y(1);
w2b=y(2);
Rb=y(3);
w2c=y(4);
Rc=y(5);
w2d=y(6);
Omegad=y(7);
w3b=y(8);
w4c=y(9);
rhoa=(w2a0/rho20+w3a0/rho30)^(-1); %Density of domain A
rhub=((1-w2b-w3b)/rho10+w2b/rho20+w3b/rho30)^(-1); %Density of domain B
rho0=((1-w2c-w4c)/rho10+w2c/rho20+w4c/rho40)^(-1); %Density of domain C
rhod=((1-w2d)/rho10+w2d/rho20)^(-1); %Density of domain D
  
```

```
w1b=1-w2b-w3b; %
w1c=1-w2c-w4c; %
w1d=1-w2d; %
```

```
%////Stop condition when Ra reach R0 or when there is not enough water
```

```
w2bStar=w2b/(w1b+w2b);
kdiss0=D2b/Ra;
if Ra>R0 && (w2sat-w2bStar)>0
    kdiss=kdiss0;
else
    kdiss=0;
end
%//////////
```

```
%////////Transport coefficients//////////
```

```
k2b=D2b/(Rb-Ra);
k2c=D2c/(Rc-Rb);
k2d=D2d/Rc;
U2b=(1/(k2b)+1/(k2c))^-1;
U2c=(1/(k2c)+1/(k2d))^-1;
k1b=D1b/(Rb-Ra);
k1c=D1c/(Rc-Rb);
m1=4.95; %w1b=m1*w1c
U1b=(1/(k1b)+m1/(k1c))^-1;
k1d=D1self/Rc;
m2=0.2; %w1c=m2*w1d
K1c=(1/(k1c)+m2/(k1d))^-1;
```

```
%//////////
```

```
%////////Parameters defined during the ODEs rearrangement//////////
```

```
rho2b3=rho10*rho20-rho20*rho30; %
rho2b2=rho10*rho30-rho20*rho30; %
rhostar=(rho20*rho30*(1-w2b-w3b)+rho10*rho30*w2b+rho10*rho20*w3b)^2/(rho10*rho20*rho30); %
alfa=w3b*(rho2b2/rhostar)/(rhub-w3b*rho2b3/rhostar); %
beta=-rhub*w3b*3*Rb^2/((Rb^3-Ra^3)*(rhub-w3b*rho2b3/rhostar)); %
gamma=rhub*w3b*3*Ra^2/((Rb^3-Ra^3)*(rhub-w3b*rho2b3/rhostar)); %
delta=3*Ra^2*rhub*kdiss*w3a0*(w2sat-w2bStar)/(w2a0*(Rb^3-Ra^3)*(rhub-w3b*rho2b3/rhostar)); %
lambda=3*Rb^2*rhub-(Rb^3-Ra^3)*beta*rho2b3/rhostar; %
chsi=3*Ra^2*rhub+gamma*(Rb^3-Ra^3)*rho2b3/rhostar; %
eps=rho2b2/rhostar*(Rb^3-Ra^3)+rho2b3*alfa*(Rb^3-Ra^3)/rhostar; %
zeta=(Rb^3-Ra^3)*rho2b3*delta/rhostar+3*Rb^2*U1b*(m1*w1c*rhoc-w1b*rhub)-3*Rb^2*U2b*(w2b*rhub-w2c*rhoc)+3*Ra^2*kdiss*rhub*(w2sat-w2bStar)/w2a0; %
fi=rhub*(Rb^3-Ra^3)-w2b*(Rb^3-Ra^3)*(rho2b2/rhostar+rho2b3*alfa/rhostar)+eps/lambda*(rhub*w2b*3*Rb^2-w2b*(Rb^3-Ra^3)*beta*rho2b3/rhostar); %
eta=(-rhub*w2b*3*Ra^2-w2b*(Rb^3-Ra^3)*rho2b3*gamma/rhostar+chsi/lambda*(rhub*w2b*3*Rb^2-w2b*(Rb^3-Ra^3)*rho2b3*beta/rhostar)); %
tau=-zeta/lambda*(rhub*w2b*3*Rb^2-w2b*(Rb^3-Ra^3)*rho2b3*beta/rhostar)+w2b*(Rb^3-Ra^3)*rho2b3*delta/rhostar+3*Ra^2*kdiss*rhub*(w2sat-w2bStar)-3*Rb^2*U2b*(w2b*rhub-w2c*rhoc); %
a=rho40*(rho10-rho20); %
b=rho20*(rho10-rho40); %
rhoestar=(rho20*rho40*(1-w2c-w4c)+rho10*rho40*w2c+rho10*rho20*w4c)^2/(rho10*rho20*rho40); %
A1=rhoc*(Rc^3-Rb^3)-b*w4c*(Rc^3-Rb^3)/rhoestar; %
B1=-rhoc*w4c*3*Rc^2; %
C1=3*Rb^2*rhoc*w4c/lambda*(chsi+eps*eta/fi); %
D1=a*w4c*(Rc^3-Rb^3)/rhoestar; %
E1=3*Rb^2*rhoc*w4c/lambda*(eps*tau/fi+zeta); %
F1=3*rhoc*Rc^2-(Rc^3-Rb^3)*b*B1/(rhoestar*A1); %
```

```
G1=rhoc*3*Rb^2*(chsi/lambda+eps*eta/(lambda*fi))+(Rc^3-Rb^3)*b*C1/(rhocstar*A1); %
H1=(Rc^3-Rb^3)*(b*D1/(rhocstar*A1)+a/rhocstar); %
I1=(Rc^3-Rb^3)*b*E1/(rhocstar*A1)+3*Rc^2*K1c*(m2*w1d*rhod-w1c*rhoc)-3*Rb^2*U1b*(m1*w1c*rhoc-
w1b*rhob)+3*Rb^2*U2b*(w2b*rhob-w2c*rhoc)-3*Rc^2*U2c*(w2c*rhoc-
w2d*rhod)+rhoc*3*Rb^2*(eps*tau/(lambda*fi)+zeta/lambda); %
L1=rhoc*w2c*3*Rc^2*H1/F1+rhoc*(Rc^3-Rb^3)+w2c*(Rc^3-Rb^3)*(-a/rhocstar-b*(D1+B1*H1/F1)/(rhocstar*A1)); %
M1=-(rhoc*w2c*(3*Rc^2*G1/F1-3*Rb^2*chsi/lambda-3*Rb^2*eta*eps/(lambda*fi))-w2c*(Rc^3-
Rb^3)*b*(C1+B1*G1/F1)/(rhocstar*A1)); %
N1=-rhoc*w2c*(3*Rc^2*I1/F1-3*Rb^2*(zeta+eta*tau/lambda)/lambda)+w2c*(Rc^3-
Rb^3)*b/(rhocstar*A1)*(E1+B1*I1/F1)+3*Rb^2*U2b*(w2b*rhob-w2c*rhoc)-3*Rc^2*U2c*(w2c*rhoc-w2d*rhod); %
rhodstar=rho10*rho20*(rho20-rho10)/(rho20*(1-w2d)+rho10*w2d)^2; %
```

```
dRa=-kdiss*rhob/(rhoa*w2a0)*(w2sat-w2bStar); %
dw2b=(eta*dRa+tau)/fi; %
dRb=(chsi*dRa+eps*dw2b+zeta)/lambda; %
dw3b=alfa*dw2b+beta*dRb+gamma*dRa+delta; %
dw2c=(M1*dRa+N1)/L1; %
dRc=(G1*dRa+H1*dw2c+I1)/F1; %
dw4c=(B1*dRc+C1*dRa+D1*dw2c+E1)/A1; %
dw2d=Np*4*pi*Rc^2/(rhod*Omegad)*(w2d*K1c*(m2*w1d*rhod-w1c*rhoc)+(1-w2d)*U2c*(w2c*rhoc-w2d*rhod)); %
dOmegad=-Omegad*rhodstar*dw2d/rhod+1/rhod*(-Np*4*pi*Rc^2*K1c*(m2*w1d*rhod-
w1c*rhoc)+Np*4*pi*Rc^2*U2c*(w2c*rhoc-w2d*rhod)); %
%////////////////////////////////////
```

```
%/////System of ODEs/////
```

```
dy(1) = dRa;
dy(2) = dw2b;
dy(3) = dRb;
dy(4) = dw2c;
dy(5) = dRc;
dy(6) = dw2d;
dy(7) = dOmegad;
dy(8) = dw3b;
dy(9) = dw4c;
%////////////////////////////////////
end
```

```
y0=[Ra0,w2b0,Rb0,w2c0,Rc0,w2d0,Omegad0,w3b0,w4c0]; %Initial conditions
options=odeset('RelTol',1e-9);
[t,y] = ode15s(@odesystem,[0 TIME],y0,options); %ODEs solver
```

```
%Results
```

```
%Domain A
Ra=y(:,1);
%Domain B
w2b=y(:,2);
w3b=y(:,8);
w1b=1-w3b-w2b;
Rb=y(:,3);
%Domain C
w2c=y(:,4);
w4c=y(:,9);
w1c=1-w2c-w4c;
Rc=y(:,5);
%Domain D
w2d=y(:,6);
w1d=1-y(:,6);
Omegad=y(:,7);
```

```
dsfilm=Rc-Rb;
swelling=(Rc-Rc0)/Rc0*100;
```

```
rhod=((1-w2d)/rho10+w2d/rho20).^(-1);
rhob(((1-w2b-w3b)/rho10+w2b/rho20+w3b/rho30).^(-1);
```

```
Omegaa0=4/3*pi*(Ra0^3-R0^3);
m20a=w2a0*rho20*Omegaa0*Np;
m20=m20a;
```

```
m2d=w2d.*rhod.*Omegad;
m2d0=w2d0*((1-w2d0)/rho10+w2d0/rho20)^(-1)*Omegad0;
```

```
Omegab=4/3*pi.*(Rb.^3-Ra.^3);
m2b=(w2b.*rhob.*Omegab).*Np;
```

```
Omegaa=4/3*pi.*(Ra.^3-R0^3);
m2a=(w2a0*rho20.*Omegaa).*Np;
```

```
release=(m2d-m2d0)/m20;
```

```
%/////////Figures////////////////////////////////////
```

```
figure
plot(t/3600,Ra*10^6,'-',t/3600,Rb*10^6,'--',t/3600,Rc*10^6,')
title('Radii evolution')
xlabel('Time [h]')
ylabel('Radius [um]')
legend('Ra','Rb','Rc')
```

```
figure
%plot(t/3600,w1b,'-',t/3600,w2b,'-',t/3600,w3b,'-')
plot(t/3600,w2b,'-')
title('Mass fractions in OmegaB')
xlabel('Time [h]')
ylabel('Mass fraction [-]')
legend('w2b')
```

```
figure
%plot(t/3600,w1c,'-',t/3600,w2c,'-',t/3600,w4c,'-')
plot(t/3600,w2c,'-')
title('Mass fractions in OmegaC')
xlabel('Time [h]')
ylabel('Mass fraction [-]')
legend('w2c')
```

```
figure
%plot(t/3600,w1d,'-',t/3600,w2d,'-')
plot(t/3600,w2d,'-')
title('Mass fractions in OmegaD')
xlabel('Time [h]')
ylabel('Mass fraction [-]')
legend('w2d')
```

```
figure
plot(t/3600,m2a*10^6,'-r',t/3600,m2b*10^6,'-g',t/3600,m2d*10^6,'-b')
title('Drug Mass in the system')
```

```
xlabel('Time [h]') % x-axis label  
ylabel('Mass [mg]') % y-axis label  
legend('m2a','m2b','m2d')
```

```
%////////End Figures////////
```

```
end
```

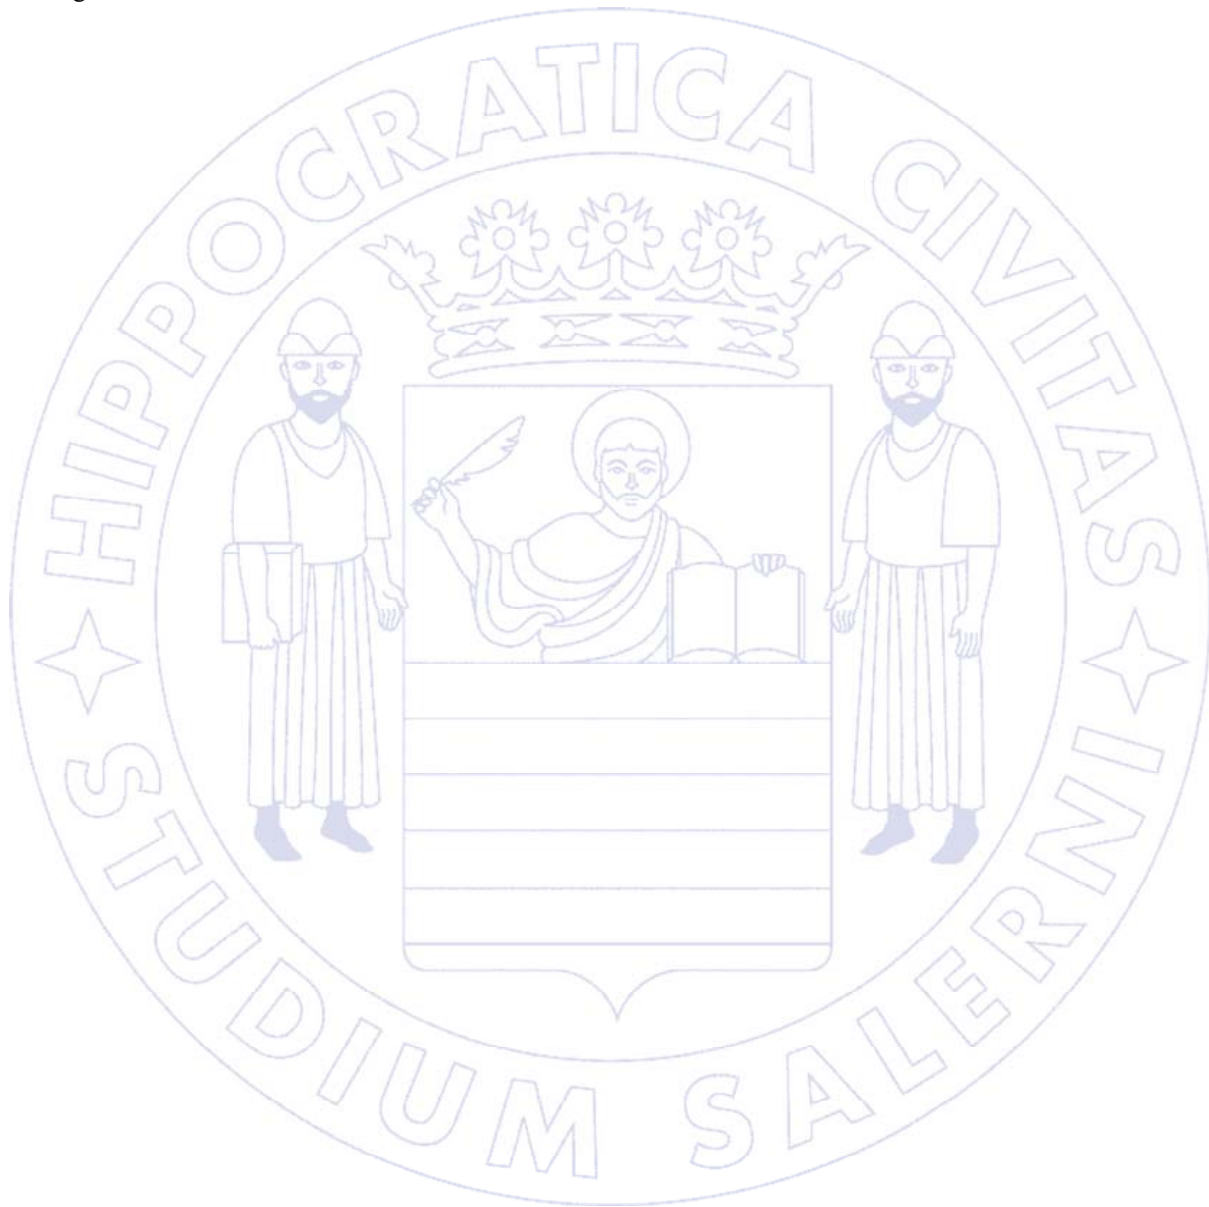

## Whole dose of pellets (CELLETS SD) – MATLAB code

```
%Everything is in SI units"
function Whole_dose_Cellels_PSD
clear all

%Initial geometry

R0=[242E-6, 275E-6, 313E-6, 356E-6, 404E-6, 459E-6];
Rb0=R0+6.3E-6;
Ra0=Rb0-1E-8;
filmt=30E-6;
Rc0=Rb0+filmt;

%Dissolution Time [s]
TIME=80*3600;
%Densities [kg/m^3]
rho10=1000; rho20=1200; rho30=1200; rho40=1200;

%Diffusivities [m^2/s]
D2b=1.5E-10; % from doi:10.1016/j.ijpharm.2015.03.054
D1b=2.2E-9; % from doi:10.1016/j.ijpharm.2015.03.054
D2c=2*3.2E-13; % from Kazlauske et al. (submitted)
D1c=1.99E-12; % from Kazlauske et al. (submitted)
D2d=8.21E-10; % from doi:10.1016/S0168-3659(01)00424-2
D1self=3E-9; % from doi:10.1039/B005319H
%See the Transport coefficients definition

%Initial mass fractions
%Domain A
w2sat=0.0115; % from doi:10.1002/jps.2600740209
w2a0=0.9; w3a0=1-w2a0;
%Domain B
w2b0=0;
w3b0=0;
%Domain C
w4c0=1;
w2c0=0;
rhoc0=((1-w2c0-w4c0)/rho10+w2c0/rho20+w4c0/rho40)^(-1);
%Domain D
w2d0=0; %w1d0=1-w2d0;

Omegad0=1E-3; % Initial dissolution medium [m^3]
Ntot=5000; % Total Number of pellets
Np=[0.079, 0.334, 0.410, 0.154, 0.020, 0.001]*Ntot; %Number of pellets in each class

function dy = odesystem (t,y)
dy=zeros(44,1); %Initialization
Ra= [y(1),y(8), y(15),y(22),y(29),y(36)];
w2b=[y(2),y(9), y(16),y(23),y(30),y(37)];
Rb= [y(3),y(10),y(17),y(24),y(31),y(38)];
w2c=[y(4),y(11),y(18),y(25),y(32),y(39)];
Rc= [y(5),y(12),y(19),y(26),y(33),y(40)];
w3b=[y(6),y(13),y(20),y(27),y(34),y(41)];
w4c=[y(7),y(14),y(21),y(28),y(35),y(42)];
w2d=y(43);
Omegad=y(44);
```

```
rhoa=(w2a0/rho20+w3a0/rho30)^(-1); %Density of domain A
rhob=((1-w2b-w3b)/rho10+w2b/rho20+w3b/rho30).^(-1); %Density of domain B
rhoc=((1-w2c-w4c)/rho10+w2c/rho20+w4c/rho40).^(-1); %Density of domain C
rhod=((1-w2d)/rho10+w2d/rho20).^(-1); %Density of domain D
w1b=1-w2b-w3b; %
w1c=1-w2c-w4c; %
w1d=1-w2d; %
```

```
%///Stop condition when Ra reach R0 or when there is not enough water
w2bStar=w2b./(w1b+w2b);
kdiss0=D2b./Ra;
kdiss=[0,0,0,0,0]; %initialization kdiss
```

```
if Ra(1)>R0(1) && (w2sat-w2bStar(1))>0
    kdiss(1)=kdiss0(1);
else
    kdiss(1)=0;
end
```

```
if Ra(2)>R0(2) && (w2sat-w2bStar(2))>0
    kdiss(2)=kdiss0(2);
else
    kdiss(2)=0;
end
```

```
if Ra(3)>R0(3) && (w2sat-w2bStar(3))>0
    kdiss(3)=kdiss0(3);
else
    kdiss(3)=0;
end
```

```
if Ra(4)>R0(4) && (w2sat-w2bStar(4))>0
    kdiss(4)=kdiss0(4);
else
    kdiss(4)=0;
end
```

```
if Ra(5)>R0(5) && (w2sat-w2bStar(5))>0
    kdiss(5)=kdiss0(5);
else
    kdiss(5)=0;
end
```

```
if Ra(6)>R0(6) && (w2sat-w2bStar(6))>0
    kdiss(6)=kdiss0(6);
else
    kdiss(6)=0;
end
```

```
%////////////////////////////////////
```

```
%////////Transport coefficients//////////
k2b=D2b./(Rb-Ra);
k2c=D2c./(Rc-Rb);
k2d=D2d./Rc;
U2b=(1./(k2b)+1./(k2c)).^(-1);
U2c=(1./(k2c)+1./(k2d)).^(-1);
k1b=D1b./(Rb-Ra);
k1c=D1c./(Rc-Rb);
m1=4.95; %w1b=m1*w1c
```





$Np(2)^4 \pi R_c(2)^2 / (\rho d \Omega) (w_2 d K_1 c(2) (m^2 w_1 d \rho d - \rho c(2) w_1 c(2)) + (1 - w_2 d) U_2 c(2) (\rho c(2) w_2 c(2) - w_2 d \rho d)) + \dots$

$Np(3)^4 \pi R_c(3)^2 / (\rho d \Omega) (w_2 d K_1 c(3) (m^2 w_1 d \rho d - \rho c(3) w_1 c(3)) + (1 - w_2 d) U_2 c(3) (\rho c(3) w_2 c(3) - w_2 d \rho d)) + \dots$

$Np(4)^4 \pi R_c(4)^2 / (\rho d \Omega) (w_2 d K_1 c(4) (m^2 w_1 d \rho d - \rho c(4) w_1 c(4)) + (1 - w_2 d) U_2 c(4) (\rho c(4) w_2 c(4) - w_2 d \rho d)) + \dots$

$Np(5)^4 \pi R_c(5)^2 / (\rho d \Omega) (w_2 d K_1 c(5) (m^2 w_1 d \rho d - \rho c(5) w_1 c(5)) + (1 - w_2 d) U_2 c(5) (\rho c(5) w_2 c(5) - w_2 d \rho d)) + \dots$

$Np(6)^4 \pi R_c(6)^2 / (\rho d \Omega) (w_2 d K_1 c(6) (m^2 w_1 d \rho d - \rho c(6) w_1 c(6)) + (1 - w_2 d) U_2 c(6) (\rho c(6) w_2 c(6) - w_2 d \rho d));$

$d\Omega = -\Omega \rho d \star dw_2 d / \rho d + 1 / \rho d \star (\dots$

$Np(1)^4 \pi R_c(1)^2 \star (-K_1 c(1) (m^2 w_1 d \rho d - w_1 c(1) \rho c(1)) + U_2 c(1) (w_2 c(1) \rho c(1) - w_2 d \rho d)) + \dots$

$Np(2)^4 \pi R_c(2)^2 \star (-K_1 c(2) (m^2 w_1 d \rho d - w_1 c(2) \rho c(2)) + U_2 c(2) (w_2 c(2) \rho c(2) - w_2 d \rho d)) + \dots$

$Np(3)^4 \pi R_c(3)^2 \star (-K_1 c(3) (m^2 w_1 d \rho d - w_1 c(3) \rho c(3)) + U_2 c(3) (w_2 c(3) \rho c(3) - w_2 d \rho d)) + \dots$

$Np(4)^4 \pi R_c(4)^2 \star (-K_1 c(4) (m^2 w_1 d \rho d - w_1 c(4) \rho c(4)) + U_2 c(4) (w_2 c(4) \rho c(4) - w_2 d \rho d)) + \dots$

$Np(5)^4 \pi R_c(5)^2 \star (-K_1 c(5) (m^2 w_1 d \rho d - w_1 c(5) \rho c(5)) + U_2 c(5) (w_2 c(5) \rho c(5) - w_2 d \rho d)) + \dots$

$Np(6)^4 \pi R_c(6)^2 \star (-K_1 c(6) (m^2 w_1 d \rho d - w_1 c(6) \rho c(6)) + U_2 c(6) (w_2 c(6) \rho c(6) - w_2 d \rho d));$

%////////////////////////////////////

%////System of ODEs////

dy(1)=dRa(1); dy(8)=dRa(2); dy(15)=dRa(3); dy(22)=dRa(4); dy(29)=dRa(5); dy(36)=dRa(6);  
 dy(2)=dw2b(1); dy(9)=dw2b(2); dy(16)=dw2b(3); dy(23)=dw2b(4); dy(30)=dw2b(5); dy(37)=dw2b(6);  
 dy(3)=dRb(1); dy(10)=dRb(2); dy(17)=dRb(3); dy(24)=dRb(4); dy(31)=dRb(5); dy(38)=dRb(6);  
 dy(4)=dw2c(1); dy(11)=dw2c(2); dy(18)=dw2c(3); dy(25)=dw2c(4); dy(32)=dw2c(5); dy(39)=dw2c(6);  
 dy(5)=dRc(1); dy(12)=dRc(2); dy(19)=dRc(3); dy(26)=dRc(4); dy(33)=dRc(5); dy(40)=dRc(6);  
 dy(6)=dw3b(1); dy(13)=dw3b(2); dy(20)=dw3b(3); dy(27)=dw3b(4); dy(34)=dw3b(5); dy(41)=dw3b(6);  
 dy(7)=dw4c(1); dy(14)=dw4c(2); dy(21)=dw4c(3); dy(28)=dw4c(4); dy(35)=dw4c(5); dy(42)=dw4c(6);

dy(43)=dw2d;

dy(44)=dOmega;

%////////////////////////////////////

end

y0=[Ra0(1),w2b0,Rb0(1),w2c0,Rc0(1),w3b0,w4c0,...

Ra0(2),w2b0,Rb0(2),w2c0,Rc0(2),w3b0,w4c0,...

Ra0(3),w2b0,Rb0(3),w2c0,Rc0(3),w3b0,w4c0,...

Ra0(4),w2b0,Rb0(4),w2c0,Rc0(4),w3b0,w4c0,...

Ra0(5),w2b0,Rb0(5),w2c0,Rc0(5),w3b0,w4c0,...

Ra0(6),w2b0,Rb0(6),w2c0,Rc0(6),w3b0,w4c0,...

w2d0, Omega0]; %Initial conditions

options=odeset('RelTol',1e-10);

tspan=0:60:TIME;

[t,y] = ode15s(@odesystem,tspan,y0,options); %ODEs solver

%Results

%Domain A

Ra=[y(:,1),y(:,8),y(:,15),y(:,22),y(:,29),y(:,36)];

%Domain B

w2b=[y(:,2),y(:,9),y(:,16),y(:,23),y(:,30),y(:,37)];

w3b=[y(:,6),y(:,13),y(:,20),y(:,27),y(:,34),y(:,41)];

w1b=1-w3b-w2b;

Rb=[y(:,3),y(:,10),y(:,17),y(:,24),y(:,31),y(:,38)];

rhob=((1-w2b-w3b)/rho10+w2b/rho20+w3b/rho30).^(-1);

%Domain C

w2c=[y(:,4),y(:,11),y(:,18),y(:,25),y(:,32),y(:,39)];

w4c=[y(:,7),y(:,14),y(:,21),y(:,28),y(:,35),y(:,42)];

w1c=1-w2c-w4c;

```

Rc=[y(:,5),y(:,12),y(:,19),y(:,26),y(:,33),y(:,40)];
rhoc=((1-w2c-w4c)/rho10+w2c/rho20+w4c/rho40).^(-1);
%Domain D
w2d=y(:,43);
w1d=1-w2d;
Omegad=y(:,44);
rhod=((1-w2d)/rho10+w2d/rho20).^(-1);
dsfilm=Rc-Rb;
%swelling=(Rc-Rc0)/Rc0*100;

m20=4/3*pi*rhoa*w2a0*(...
  Np(1)*(Ra0(1)^3-R0(1)^3)+...
  Np(2)*(Ra0(2)^3-R0(2)^3)+...
  Np(3)*(Ra0(3)^3-R0(3)^3)+...
  Np(4)*(Ra0(4)^3-R0(4)^3)+...
  Np(5)*(Ra0(5)^3-R0(5)^3)+...
  Np(6)*(Ra0(6)^3-R0(6)^3));

release=w2d.*rhod.*Omegad./m20;

m2a=4/3*pi*rhoa*w2a0*(...
  Np(1)*(Ra(:,1).^3-R0(1).^3)+...
  Np(2)*(Ra(:,2).^3-R0(2).^3)+...
  Np(3)*(Ra(:,3).^3-R0(3).^3)+...
  Np(4)*(Ra(:,4).^3-R0(4).^3)+...
  Np(5)*(Ra(:,5).^3-R0(5).^3)+...
  Np(6)*(Ra(:,6).^3-R0(6).^3));

m2b=4/3*pi*(...
  Np(1).*w2b(:,1).*rhob(:,1).*Rb(:,1).^3-Ra(:,1).^3)+...
  Np(2).*w2b(:,2).*rhob(:,2).*Rb(:,2).^3-Ra(:,2).^3)+...
  Np(3).*w2b(:,3).*rhob(:,3).*Rb(:,3).^3-Ra(:,3).^3)+...
  Np(4).*w2b(:,4).*rhob(:,4).*Rb(:,4).^3-Ra(:,4).^3)+...
  Np(5).*w2b(:,5).*rhob(:,5).*Rb(:,5).^3-Ra(:,5).^3)+...
  Np(6).*w2b(:,6).*rhob(:,6).*Rb(:,6).^3-Ra(:,6).^3));

m2c=4/3*pi*(...
  Np(1)*w2c(:,1).*rhoc(:,1).*Rc(:,1).^3-Rb(:,1).^3)+...
  Np(2)*w2c(:,2).*rhoc(:,2).*Rc(:,2).^3-Rb(:,2).^3)+...
  Np(3)*w2c(:,3).*rhoc(:,3).*Rc(:,3).^3-Rb(:,3).^3)+...
  Np(4)*w2c(:,4).*rhoc(:,4).*Rc(:,4).^3-Rb(:,4).^3)+...
  Np(5)*w2c(:,5).*rhoc(:,5).*Rc(:,5).^3-Rb(:,5).^3)+...
  Np(6)*w2c(:,6).*rhoc(:,6).*Rc(:,6).^3-Rb(:,6).^3));

%//////////Release from the ith%class//////////
m201=4/3*pi*rhoa*w2a0*(Np(1)*(Ra0(1)^3-R0(1)^3));
m2a1=4/3.*pi.*rhoa.*w2a0.*(Np(1)*(Ra(:,1).^3-R0(1).^3));
m2b1=4/3*pi*(Np(1).*w2b(:,1).*rhob(:,1).*Rb(:,1).^3-Ra(:,1).^3));
m2c1=4/3*pi*(Np(1)*w2c(:,1).*rhoc(:,1).*Rc(:,1).^3-Rb(:,1).^3));
release1=(m201-(m2a1+m2b1+m2c1))/m201;

m202=4/3*pi*rhoa*w2a0*(Np(2)*(Ra0(2)^3-R0(2)^3));
m2a2=4/3*pi*rhoa*w2a0*(Np(2)*(Ra(:,2).^3-R0(2).^3));
m2b2=4/3*pi*(Np(2).*w2b(:,2).*rhob(:,2).*Rb(:,2).^3-Ra(:,2).^3));
m2c2=4/3*pi*(Np(2)*w2c(:,2).*rhoc(:,2).*Rc(:,2).^3-Rb(:,2).^3));
release2=(m202-(m2a2+m2b2+m2c2))/m202;

m203=4/3*pi*rhoa*w2a0*(Np(3)*(Ra0(3)^3-R0(3)^3));
m2a3=4/3*pi*rhoa*w2a0*(Np(3)*(Ra(:,3).^3-R0(3).^3));

```



```
y30=[1.310134018,5.100524125,7.501053805,10.1312529,13.43881706,17.69370403,22.73221795,27.66044764,32.35499387,36.98
307846,46.18394602,55.09346624,62.83360535,69.7154417,75.46837038,78.27760034,86.41201019,89.42124639,92.19890086,95.
74649776,95.51165956,99.26835398,99.19284621,101.168998,99.65818819,99.97996757,100,100,100,100,100,100,100,100,10
0,100,100,100,100,100,100,100,100];
```

```
y60=[1.981569582,5.115953377,6.765312431,8.137103313,9.353900156,11.22879192,13.79075693,16.71703661,18.902185,21.616
99951,26.00686318,30.75278334,35.28025299,39.22761513,43.25815544,47.05651527,50.97411896,55.24559284,58.80588289,62.
18060217,65.82993692,68.66016577,71.95850492,74.53939,76.75124643,78.92388318,82.16850129,84.34895295,85.95549981,87.
87383053,89.39914511,90.28398997,90.62647986,92.40681804,93.39578489,94.66340375,94.54008634,96.17876151,96.59720818,
97.49118014,97.11047724,97.55955686,98.22587734,99.96597617,98.83363928]; %Global TP release with film thickness of 60 um
%%//////End Experimental data//////
```

```
figure
plot(texp,y20,'o',texp,y30,'+',texp,y60,'x',t/3600,release*100,'-');
xlabel('Time [h]');
ylabel('Release %');
legend('Exp 20um','Exp 30um','Exp 60um','Mod 20um')
```

```
%%//////End Figures//////
```

```
end
```

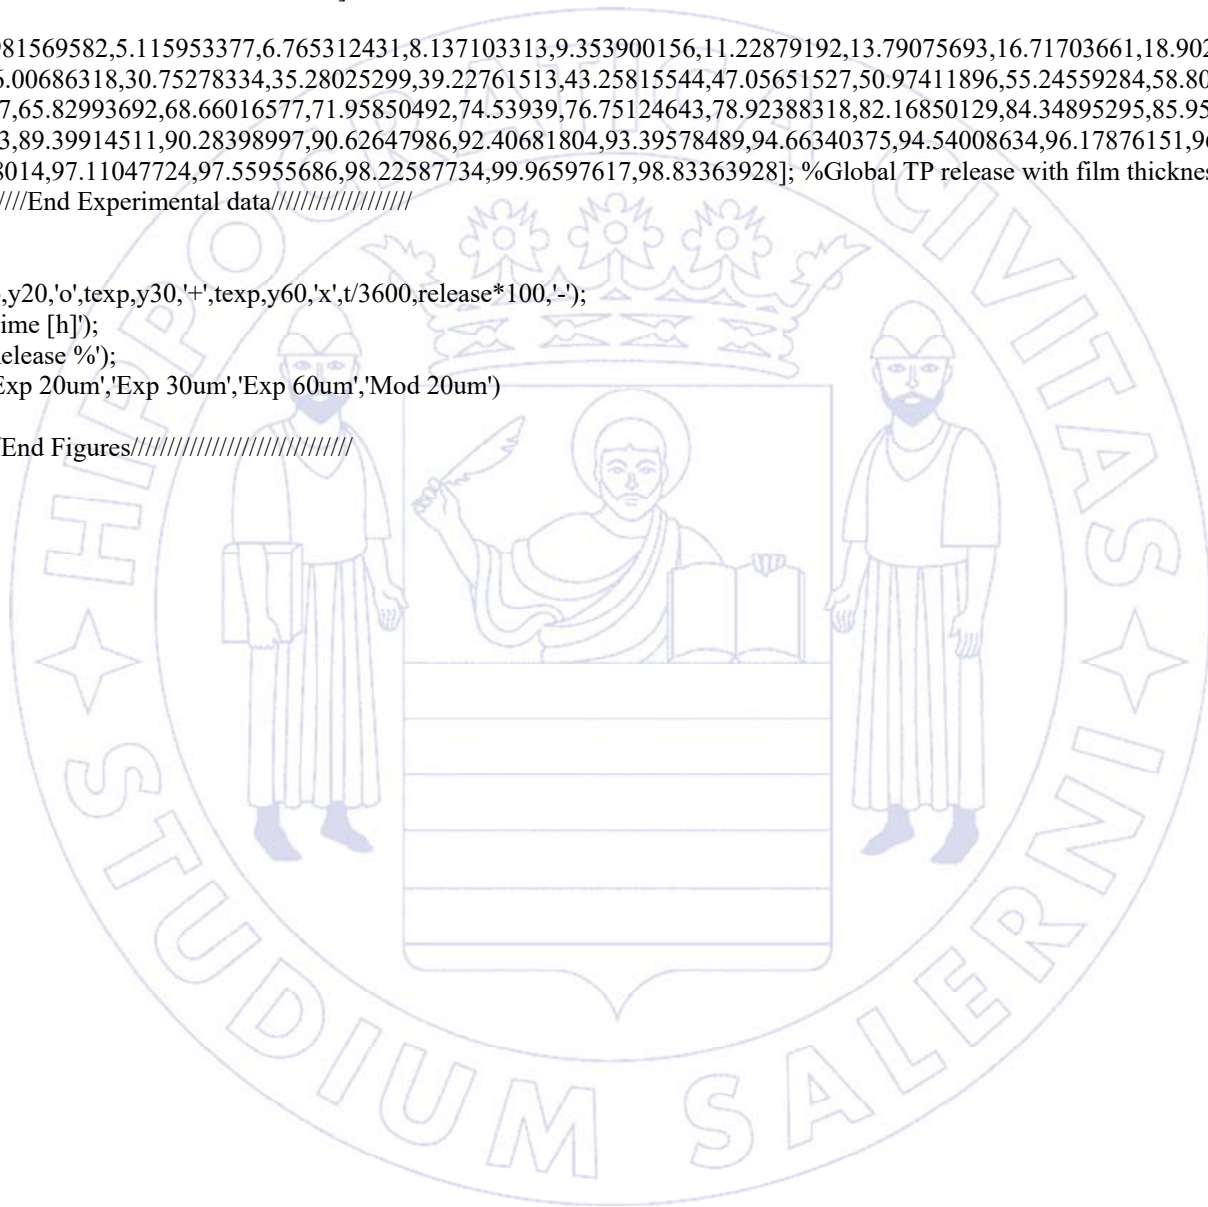

## Whole dose of pellets (film thickness SD) – MATLAB code

%Everything is in SI units"

```
function Whole_dose_Film_thickness

%////////Assign a film thickness with a normal distribution////////
mu=13.3E-6;
sigma=5E-6;
pd = makedist('Normal','mu',mu,'sigma',sigma);
upper=mu*3;
x=linspace(0,upper,11);
for j=1:10
    filmt(j)=(x(j)+x(j+1))/2;
end
z = cdf(pd,x);
for i=2:11
    ni_on_ntot(i-1)=(z(i)-z(i-1));
end
plot(x,z)
%////////End Assign a film thickness with a normal distribution////////

%////////Parameters////////

%Initial geometry
R0=[300E-6,300E-6,300E-6,300E-6,300E-6,300E-6,300E-6,300E-6,300E-6,300E-6];
Rb0=R0+6.3E-6;
Ra0=Rb0-1E-8;
Rc0=Rb0+filmt;
Ntot=5000; %Total Number of pellets
Np=ni_on_ntot*Ntot; %Number of pellets in each class

%Dissolution Time [s]
TIME=80*3600;
%Densities [kg/m^3]
rho10=1000; rho20=1200; rho30=1200; rho40=1200;

%Diffusivities [m^2/s]
D2b=1.5E-10; % from doi:10.1016/j.ijpharm.2015.03.054
D1b=2.2E-9; % from doi:10.1016/j.ijpharm.2015.03.054
D2c=3.2E-13; % from Kazlauske et al. (submitted)
D1c=1.99E-12; % from Kazlauske et al. (submitted)
D2d=8.21E-10; % from doi:10.1016/S0168-3659(01)00424-2
D1self=3E-9; % from doi:10.1039/B005319H
%See the Transport coefficients definition

%Initial mass fractions
%Domain A
w2sat=0.0115; % from doi:10.1002/jps.26007402091
w2a0=0.9; w3a0=1-w2a0;
%Domain B
w2b0=0;
w3b0=0;
%Domain C
w4c0=1;
w2c0=0;
rho0=((1-w2c0-w4c0)/rho10+w2c0/rho20+w4c0/rho40)^(-1);
%Domain D
w2d0=0; %w1d0=1-w2d0;
```

Omegad0=1E-3; % Initial dissolution medium [m<sup>3</sup>]

%//////////End Parameters//////////

```
function dy = odesystem (t,y)
dy=zeros(72,1); %Initialization
Ra= [y(1),y(8), y(15),y(22),y(29),y(36),y(43),y(50),y(57),y(64)];
w2b=[y(2),y(9), y(16),y(23),y(30),y(37),y(44),y(51),y(58),y(65)];
Rb= [y(3),y(10),y(17),y(24),y(31),y(38),y(45),y(52),y(59),y(66)];
w2c=[y(4),y(11),y(18),y(25),y(32),y(39),y(46),y(53),y(60),y(67)];
Rc= [y(5),y(12),y(19),y(26),y(33),y(40),y(47),y(54),y(61),y(68)];
w3b=[y(6),y(13),y(20),y(27),y(34),y(41),y(48),y(55),y(62),y(69)];
w4c=[y(7),y(14),y(21),y(28),y(35),y(42),y(49),y(56),y(63),y(70)];
w2d=y(71);
Omegad=y(72);

rhoa=(w2a0/rho20+w3a0/rho30)^(-1); %Density of domain A
rhub=((1-w2b-w3b)/rho10+w2b/rho20+w3b/rho30).^(-1); %Density of domain B
rhoc=((1-w2c-w4c)/rho10+w2c/rho20+w4c/rho40).^(-1); %Density of domain C
rhod=((1-w2d)/rho10+w2d/rho20).^(-1); %Density of domain D
w1b=1-w2b-w3b; %
w1c=1-w2c-w4c; %
w1d=1-w2d; %

%////Stop condition when Ra reach R0 or when there is not enough water////
w2bStar=w2b./(w1b+w2b);
kdiss0=D2b./Ra;
kdiss=[0,0,0,0,0,0,0,0,0,0]; %initialization kdiss

if Ra(1)>R0(1) && (w2sat-w2bStar(1))>0
    kdiss(1)=kdiss0(1);
else
    kdiss(1)=0;
end

if Ra(2)>R0(2) && (w2sat-w2bStar(2))>0
    kdiss(2)=kdiss0(2);
else
    kdiss(2)=0;
end

if Ra(3)>R0(3) && (w2sat-w2bStar(3))>0
    kdiss(3)=kdiss0(3);
else
    kdiss(3)=0;
end

if Ra(4)>R0(4) && (w2sat-w2bStar(4))>0
    kdiss(4)=kdiss0(4);
else
    kdiss(4)=0;
end

if Ra(5)>R0(5) && (w2sat-w2bStar(5))>0
    kdiss(5)=kdiss0(5);
else
    kdiss(5)=0;
end
```

```

if Ra(6)>R0(6) && (w2sat-w2bStar(6))>0
  kdiss(6)=kdiss0(6);
else
  kdiss(6)=0;
end
if Ra(7)>R0(7) && (w2sat-w2bStar(7))>0
  kdiss(7)=kdiss0(7);
else
  kdiss(7)=0;
end
if Ra(8)>R0(8) && (w2sat-w2bStar(8))>0
  kdiss(8)=kdiss0(8);
else
  kdiss(8)=0;
end
if Ra(9)>R0(9) && (w2sat-w2bStar(9))>0
  kdiss(9)=kdiss0(9);
else
  kdiss(9)=0;
end
if Ra(10)>R0(10) && (w2sat-w2bStar(10))>0
  kdiss(10)=kdiss0(10);
else
  kdiss(10)=0;
end
%////End Stop condition when Ra reach R0 or when there is not enough water/

%//////////Transport coefficients//////////
k2b=D2b./(Rb-Ra);
k2c=D2c./(Rc-Rb);
k2d=D2d./Rc;
U2b=(1./(k2b)+1./(k2c)).^(-1);
U2c=(1./(k2c)+1./(k2d)).^(-1);
k1b=D1b./(Rb-Ra);
k1c=D1c./(Rc-Rb);
m1=4.95; %w1b=m1*w1c
U1b=(1./(k1b)+m1./(k1c)).^(-1);
k1d=D1self./Rc;
m2=0.2; %w1c=m2*w1d
K1c=(1./(k1c)+m2./(k1d)).^(-1);
%//////////End Transport coefficients//////////

%//////////Parameters defined during the ODEs rearrangement//////////
rho2b3=rho10.*rho20-rho20.*rho30; %
rho2b2=rho10.*rho30-rho20.*rho30; %
rhostar=(rho20.*rho30.*(1-w2b-w3b)+rho10.*rho30.*w2b+rho10.*rho20.*w3b).^2./(rho10.*rho20.*rho30); %
alfa=w3b.*(rho2b2./rhostar)./(rhub-w3b.*rho2b3./rhostar); %
beta=-rhub.*w3b.*3.*Rb.^2./((Rb.^3-Ra.^3).*(rhub-w3b.*rho2b3./rhostar)); %
gamma=rhub.*w3b.*3.*Ra.^2./((Rb.^3-Ra.^3).*(rhub-w3b.*rho2b3./rhostar)); %
delta=3.*Ra.^2.*rhub.*kdiss.*w3a0.*(w2sat-w2bStar)./(w2a0.*(Rb.^3-Ra.^3).*(rhub-w3b.*rho2b3./rhostar)); %
lambda=3.*Rb.^2.*rhub-(Rb.^3-Ra.^3).*beta.*rho2b3./rhostar; %
chsi=3.*Ra.^2.*rhub+gamma.*(Rb.^3-Ra.^3).*rho2b3./rhostar; %
eps=rho2b2./rhostar.*(Rb.^3-Ra.^3)+rho2b3.*alfa.*(Rb.^3-Ra.^3)./rhostar; %
zeta=(Rb.^3-Ra.^3).*rho2b3.*delta./rhostar+3.*Rb.^2.*U1b.*(m1.*w1c.*rhoc-w1b.*rhub)-3.*Rb.^2.*U2b.*(w2b.*rhub-
w2c.*rhoc)+3.*Ra.^2.*kdiss.*rhub.*(w2sat-w2bStar)./w2a0; %
fi=rhub.*(Rb.^3-Ra.^3)-w2b.*(Rb.^3-Ra.^3).*(rho2b2./rhostar+rho2b3.*alfa./rhostar)+eps./lambda.*(rhub.*w2b.*3.*Rb.^2-
w2b.*(Rb.^3-Ra.^3).*beta.*rho2b3./rhostar); %

```

$\eta = -(\rho_{hb} \cdot w_{2b} \cdot 3 \cdot R_a \cdot \wedge^2 - w_{2b} \cdot (\rho_{b \wedge 3} - R_a \cdot \wedge^3) \cdot \rho_{h2b3} \cdot \gamma / \rho_{hstar} + \text{chsi} / \lambda \cdot (\rho_{hb} \cdot w_{2b} \cdot 3 \cdot R_b \cdot \wedge^2 - w_{2b} \cdot (\rho_{b \wedge 3} - R_a \cdot \wedge^3) \cdot \rho_{h2b3} \cdot \beta / \rho_{hstar})) / \%$   
 $\tau = -\zeta / \lambda \cdot (\rho_{hb} \cdot w_{2b} \cdot 3 \cdot R_b \cdot \wedge^2 - w_{2b} \cdot (\rho_{b \wedge 3} - R_a \cdot \wedge^3) \cdot \rho_{h2b3} \cdot \beta / \rho_{hstar}) + w_{2b} \cdot (\rho_{b \wedge 3} - R_a \cdot \wedge^3) \cdot \rho_{h2b3} \cdot \delta / \rho_{hstar} + 3 \cdot R_a \cdot \wedge^2 \cdot k_{diss} \cdot \rho_{hb} \cdot (w_{2sat} - w_{2bStar}) - 3 \cdot R_b \cdot \wedge^2 \cdot U_{2b} \cdot (w_{2b} \cdot \rho_{hb} - w_{2c} \cdot \rho_{hc}) / \%$   
 $a = \rho_{h40} \cdot (\rho_{h10} - \rho_{h20}) / \%$   
 $b = \rho_{h20} \cdot (\rho_{h10} - \rho_{h40}) / \%$   
 $\rho_{hstar} = (\rho_{h20} \cdot \rho_{h40} \cdot (1 - w_{2c} - w_{4c}) + \rho_{h10} \cdot \rho_{h40} \cdot w_{2c} + \rho_{h10} \cdot \rho_{h20} \cdot w_{4c}) \cdot \wedge^2 / (\rho_{h10} \cdot \rho_{h20} \cdot \rho_{h40}) / \%$   
 $A1 = \rho_{hc} \cdot (R_c \cdot \wedge^3 - R_b \cdot \wedge^3) \cdot b \cdot w_{4c} \cdot (R_c \cdot \wedge^3 - R_b \cdot \wedge^3) / \rho_{hstar} / \%$   
 $B1 = -\rho_{hc} \cdot w_{4c} \cdot 3 \cdot R_c \cdot \wedge^2 / \%$   
 $C1 = 3 \cdot R_b \cdot \wedge^2 \cdot \rho_{hc} \cdot w_{4c} / \lambda \cdot (\text{chsi} + \text{eps} \cdot \eta / \text{fi}) / \%$   
 $D1 = a \cdot w_{4c} \cdot (R_c \cdot \wedge^3 - R_b \cdot \wedge^3) / \rho_{hstar} / \%$   
 $E1 = 3 \cdot R_b \cdot \wedge^2 \cdot \rho_{hc} \cdot w_{4c} / \lambda \cdot (\text{eps} \cdot \tau / \text{fi} + \zeta) / \%$   
 $F1 = 3 \cdot \rho_{hc} \cdot R_c \cdot \wedge^2 - (R_c \cdot \wedge^3 - R_b \cdot \wedge^3) \cdot b \cdot B1 / (\rho_{hstar} \cdot A1) / \%$   
 $G1 = \rho_{hc} \cdot 3 \cdot R_b \cdot \wedge^2 \cdot (\text{chsi} / \lambda + \text{eps} \cdot \eta / (\lambda \cdot \text{fi})) + (R_c \cdot \wedge^3 - R_b \cdot \wedge^3) \cdot b \cdot C1 / (\rho_{hstar} \cdot A1) / \%$   
 $H1 = (R_c \cdot \wedge^3 - R_b \cdot \wedge^3) \cdot (b \cdot D1 / (\rho_{hstar} \cdot A1) + a / \rho_{hstar}) / \%$   
 $I1 = (R_c \cdot \wedge^3 - R_b \cdot \wedge^3) \cdot b \cdot E1 / (\rho_{hstar} \cdot A1) + 3 \cdot R_c \cdot \wedge^2 \cdot K1c \cdot (m2 \cdot w1d \cdot \rho_{hd} - w1c \cdot \rho_{hc}) - 3 \cdot R_b \cdot \wedge^2 \cdot U1b \cdot (m1 \cdot w1c \cdot \rho_{hb} - w1b \cdot \rho_{hb}) + 3 \cdot R_b \cdot \wedge^2 \cdot U2b \cdot (w2b \cdot \rho_{hb} - w2c \cdot \rho_{hc}) - 3 \cdot R_c \cdot \wedge^2 \cdot U2c \cdot (w2c \cdot \rho_{hc} - w2d \cdot \rho_{hd}) + \rho_{hc} \cdot 3 \cdot R_b \cdot \wedge^2 \cdot (\text{eps} \cdot \tau / (\lambda \cdot \text{fi}) + \zeta / \lambda) / \%$   
 $L1 = \rho_{hc} \cdot w_{2c} \cdot 3 \cdot R_c \cdot \wedge^2 \cdot H1 / F1 + \rho_{hc} \cdot (R_c \cdot \wedge^3 - R_b \cdot \wedge^3) + w_{2c} \cdot (R_c \cdot \wedge^3 - R_b \cdot \wedge^3) \cdot (-a / \rho_{hstar} - b \cdot (D1 + B1 \cdot H1 / F1) / (\rho_{hstar} \cdot A1)) / \%$   
 $M1 = -(\rho_{hc} \cdot w_{2c} \cdot (3 \cdot R_c \cdot \wedge^2 \cdot G1 / F1 - 3 \cdot R_b \cdot \wedge^2 \cdot \text{chsi} / \lambda - 3 \cdot R_b \cdot \wedge^2 \cdot \eta \cdot \text{eps} / (\lambda \cdot \text{fi})) - w_{2c} \cdot (R_c \cdot \wedge^3 - R_b \cdot \wedge^3) \cdot b \cdot (C1 + B1 \cdot G1 / F1) / (\rho_{hstar} \cdot A1)) / \%$   
 $N1 = -\rho_{hc} \cdot w_{2c} \cdot (3 \cdot R_c \cdot \wedge^2 \cdot I1 / F1 - 3 \cdot R_b \cdot \wedge^2 \cdot (\zeta + \eta \cdot \tau / \text{fi}) / \lambda) + w_{2c} \cdot (R_c \cdot \wedge^3 - R_b \cdot \wedge^3) \cdot b / (\rho_{hstar} \cdot A1) \cdot (E1 + B1 \cdot I1 / F1) + 3 \cdot R_b \cdot \wedge^2 \cdot U2b \cdot (w2b \cdot \rho_{hb} - w2c \cdot \rho_{hc}) - 3 \cdot R_c \cdot \wedge^2 \cdot U2c \cdot (w2c \cdot \rho_{hc} - w2d \cdot \rho_{hd}) / \%$   
 $\rho_{hdstar} = \rho_{h10} \cdot \rho_{h20} \cdot (\rho_{h20} - \rho_{h10}) / (\rho_{h20} \cdot (1 - w_{2d}) + \rho_{h10} \cdot w_{2d}) \cdot \wedge^2 / \%$

$dR_a = k_{diss} \cdot \rho_{hb} / (\rho_{h0} \cdot w_{2a0}) \cdot (w_{2sat} - w_{2bStar}) / \%$   
 $dw_{2b} = (\eta \cdot dR_a + \tau) / \text{fi} / \%$   
 $dR_b = (\text{chsi} \cdot dR_a + \text{eps} \cdot dw_{2b} + \zeta) / \lambda / \%$   
 $dw_{3b} = \alpha \cdot dw_{2b} + \beta \cdot dR_b + \gamma \cdot dR_a + \delta / \%$   
 $dw_{2c} = (M1 \cdot dR_a + N1) / L1 / \%$   
 $dR_c = (G1 \cdot dR_a + H1 \cdot dw_{2c} + I1) / F1 / \%$   
 $dw_{4c} = (B1 \cdot dR_c + C1 \cdot dR_a + D1 \cdot dw_{2c} + E1) / A1 / \%$   
 $dw_{2d} = \dots$   
 $Np(1) \cdot 4 \cdot \pi \cdot R_c(1) \cdot \wedge^2 / (\rho_{hd} \cdot \Omega) \cdot (w_{2d} \cdot K1c(1) \cdot (m2 \cdot w1d \cdot \rho_{hd} - \rho_{hc}(1) \cdot w1c(1)) + (1 - w_{2d}) \cdot U_{2c}(1) \cdot (\rho_{hc}(1) \cdot w_{2c}(1) - w_{2d} \cdot \rho_{hd})) + \dots$   
 $Np(2) \cdot 4 \cdot \pi \cdot R_c(2) \cdot \wedge^2 / (\rho_{hd} \cdot \Omega) \cdot (w_{2d} \cdot K1c(2) \cdot (m2 \cdot w1d \cdot \rho_{hd} - \rho_{hc}(2) \cdot w1c(2)) + (1 - w_{2d}) \cdot U_{2c}(2) \cdot (\rho_{hc}(2) \cdot w_{2c}(2) - w_{2d} \cdot \rho_{hd})) + \dots$   
 $Np(3) \cdot 4 \cdot \pi \cdot R_c(3) \cdot \wedge^2 / (\rho_{hd} \cdot \Omega) \cdot (w_{2d} \cdot K1c(3) \cdot (m2 \cdot w1d \cdot \rho_{hd} - \rho_{hc}(3) \cdot w1c(3)) + (1 - w_{2d}) \cdot U_{2c}(3) \cdot (\rho_{hc}(3) \cdot w_{2c}(3) - w_{2d} \cdot \rho_{hd})) + \dots$   
 $Np(4) \cdot 4 \cdot \pi \cdot R_c(4) \cdot \wedge^2 / (\rho_{hd} \cdot \Omega) \cdot (w_{2d} \cdot K1c(4) \cdot (m2 \cdot w1d \cdot \rho_{hd} - \rho_{hc}(4) \cdot w1c(4)) + (1 - w_{2d}) \cdot U_{2c}(4) \cdot (\rho_{hc}(4) \cdot w_{2c}(4) - w_{2d} \cdot \rho_{hd})) + \dots$   
 $Np(5) \cdot 4 \cdot \pi \cdot R_c(5) \cdot \wedge^2 / (\rho_{hd} \cdot \Omega) \cdot (w_{2d} \cdot K1c(5) \cdot (m2 \cdot w1d \cdot \rho_{hd} - \rho_{hc}(5) \cdot w1c(5)) + (1 - w_{2d}) \cdot U_{2c}(5) \cdot (\rho_{hc}(5) \cdot w_{2c}(5) - w_{2d} \cdot \rho_{hd})) + \dots$   
 $Np(6) \cdot 4 \cdot \pi \cdot R_c(6) \cdot \wedge^2 / (\rho_{hd} \cdot \Omega) \cdot (w_{2d} \cdot K1c(6) \cdot (m2 \cdot w1d \cdot \rho_{hd} - \rho_{hc}(6) \cdot w1c(6)) + (1 - w_{2d}) \cdot U_{2c}(6) \cdot (\rho_{hc}(6) \cdot w_{2c}(6) - w_{2d} \cdot \rho_{hd})) + \dots$   
 $Np(7) \cdot 4 \cdot \pi \cdot R_c(7) \cdot \wedge^2 / (\rho_{hd} \cdot \Omega) \cdot (w_{2d} \cdot K1c(7) \cdot (m2 \cdot w1d \cdot \rho_{hd} - \rho_{hc}(7) \cdot w1c(7)) + (1 - w_{2d}) \cdot U_{2c}(7) \cdot (\rho_{hc}(7) \cdot w_{2c}(7) - w_{2d} \cdot \rho_{hd})) + \dots$   
 $Np(8) \cdot 4 \cdot \pi \cdot R_c(8) \cdot \wedge^2 / (\rho_{hd} \cdot \Omega) \cdot (w_{2d} \cdot K1c(8) \cdot (m2 \cdot w1d \cdot \rho_{hd} - \rho_{hc}(8) \cdot w1c(8)) + (1 - w_{2d}) \cdot U_{2c}(8) \cdot (\rho_{hc}(8) \cdot w_{2c}(8) - w_{2d} \cdot \rho_{hd})) + \dots$   
 $Np(9) \cdot 4 \cdot \pi \cdot R_c(9) \cdot \wedge^2 / (\rho_{hd} \cdot \Omega) \cdot (w_{2d} \cdot K1c(9) \cdot (m2 \cdot w1d \cdot \rho_{hd} - \rho_{hc}(9) \cdot w1c(9)) + (1 - w_{2d}) \cdot U_{2c}(9) \cdot (\rho_{hc}(9) \cdot w_{2c}(9) - w_{2d} \cdot \rho_{hd})) + \dots$   
 $Np(10) \cdot 4 \cdot \pi \cdot R_c(10) \cdot \wedge^2 / (\rho_{hd} \cdot \Omega) \cdot (w_{2d} \cdot K1c(10) \cdot (m2 \cdot w1d \cdot \rho_{hd} - \rho_{hc}(10) \cdot w1c(10)) + (1 - w_{2d}) \cdot U_{2c}(10) \cdot (\rho_{hc}(10) \cdot w_{2c}(10) - w_{2d} \cdot \rho_{hd})) / \%$

$d\Omega = -\Omega \cdot \rho_{hdstar} \cdot dw_{2d} / \rho_{hd} + 1 / \rho_{hd} \cdot (\dots$   
 $Np(1) \cdot 4 \cdot \pi \cdot R_c(1) \cdot \wedge^2 \cdot (-K1c(1) \cdot (m2 \cdot w1d \cdot \rho_{hd} - w1c(1) \cdot \rho_{hc}(1)) + U_{2c}(1) \cdot (w_{2c}(1) \cdot \rho_{hc}(1) - w_{2d} \cdot \rho_{hd})) + \dots$   
 $Np(2) \cdot 4 \cdot \pi \cdot R_c(2) \cdot \wedge^2 \cdot (-K1c(2) \cdot (m2 \cdot w1d \cdot \rho_{hd} - w1c(2) \cdot \rho_{hc}(2)) + U_{2c}(2) \cdot (w_{2c}(2) \cdot \rho_{hc}(2) - w_{2d} \cdot \rho_{hd})) + \dots$



```

Np(3)*4*pi*Rc(3)^2*(-K1c(3)*(m2*w1d*rhod-w1c(3)*rhoc(3))+U2c(3)*(w2c(3)*rhoc(3)-w2d*rhod))+...
Np(4)*4*pi*Rc(4)^2*(-K1c(4)*(m2*w1d*rhod-w1c(4)*rhoc(4))+U2c(4)*(w2c(4)*rhoc(4)-w2d*rhod))+...
Np(5)*4*pi*Rc(5)^2*(-K1c(5)*(m2*w1d*rhod-w1c(5)*rhoc(5))+U2c(5)*(w2c(5)*rhoc(5)-w2d*rhod))+...
Np(6)*4*pi*Rc(6)^2*(-K1c(6)*(m2*w1d*rhod-w1c(6)*rhoc(6))+U2c(6)*(w2c(6)*rhoc(6)-w2d*rhod))+...
Np(7)*4*pi*Rc(7)^2*(-K1c(7)*(m2*w1d*rhod-w1c(7)*rhoc(7))+U2c(7)*(w2c(7)*rhoc(7)-w2d*rhod))+...
Np(8)*4*pi*Rc(8)^2*(-K1c(8)*(m2*w1d*rhod-w1c(8)*rhoc(8))+U2c(8)*(w2c(8)*rhoc(8)-w2d*rhod))+...
Np(9)*4*pi*Rc(9)^2*(-K1c(9)*(m2*w1d*rhod-w1c(9)*rhoc(9))+U2c(9)*(w2c(9)*rhoc(9)-w2d*rhod))+...
Np(10)*4*pi*Rc(10)^2*(-K1c(10)*(m2*w1d*rhod-w1c(10)*rhoc(10))+U2c(10)*(w2c(10)*rhoc(10)-w2d*rhod));
%//////////End Parameters defined during the ODEs rearrangement//////////

%//////////System of ODEs//////////
dy(1)=dRa(1); dy(8)=dRa(2); dy(15)=dRa(3); dy(22)=dRa(4); dy(29)=dRa(5); dy(36)=dRa(6); dy(43)=dRa(7); dy(50)=dRa(8);
dy(57)=dRa(9); dy(64)=dRa(10);
dy(2)=dw2b(1); dy(9)=dw2b(2); dy(16)=dw2b(3); dy(23)=dw2b(4); dy(30)=dw2b(5); dy(37)=dw2b(6); dy(44)=dw2b(7);
dy(51)=dw2b(8); dy(58)=dw2b(9); dy(65)=dw2b(10);
dy(3)=dRb(1); dy(10)=dRb(2); dy(17)=dRb(3); dy(24)=dRb(4); dy(31)=dRb(5); dy(38)=dRb(6); dy(45)=dRb(7); dy(52)=dRb(8);
dy(59)=dRb(9); dy(66)=dRb(10);
dy(4)=dw2c(1); dy(11)=dw2c(2); dy(18)=dw2c(3); dy(25)=dw2c(4); dy(32)=dw2c(5); dy(39)=dw2c(6); dy(46)=dw2c(7);
dy(53)=dw2c(8); dy(60)=dw2c(9); dy(67)=dw2c(10);
dy(5)=dRc(1); dy(12)=dRc(2); dy(19)=dRc(3); dy(26)=dRc(4); dy(33)=dRc(5); dy(40)=dRc(6); dy(47)=dRc(7); dy(54)=dRc(8);
dy(61)=dRc(9); dy(68)=dRc(10);
dy(6)=dw3b(1); dy(13)=dw3b(2); dy(20)=dw3b(3); dy(27)=dw3b(4); dy(34)=dw3b(5); dy(41)=dw3b(6); dy(48)=dw3b(7);
dy(55)=dw3b(8); dy(62)=dw3b(9); dy(69)=dw3b(10);
dy(7)=dw4c(1); dy(14)=dw4c(2); dy(21)=dw4c(3); dy(28)=dw4c(4); dy(35)=dw4c(5); dy(42)=dw4c(6); dy(49)=dw4c(7);
dy(56)=dw4c(8); dy(63)=dw4c(9); dy(70)=dw4c(10);

dy(71)=dw2d;
dy(72)=dOmegad;
%//////////End System of ODEs//////////
end

y0=[Ra0(1),w2b0,Rb0(1),w2c0,Rc0(1),w3b0,w4c0,...
Ra0(2),w2b0,Rb0(2),w2c0,Rc0(2),w3b0,w4c0,...
Ra0(3),w2b0,Rb0(3),w2c0,Rc0(3),w3b0,w4c0,...
Ra0(4),w2b0,Rb0(4),w2c0,Rc0(4),w3b0,w4c0,...
Ra0(5),w2b0,Rb0(5),w2c0,Rc0(5),w3b0,w4c0,...
Ra0(6),w2b0,Rb0(6),w2c0,Rc0(6),w3b0,w4c0,...
Ra0(7),w2b0,Rb0(7),w2c0,Rc0(7),w3b0,w4c0,...
Ra0(8),w2b0,Rb0(8),w2c0,Rc0(8),w3b0,w4c0,...
Ra0(9),w2b0,Rb0(9),w2c0,Rc0(9),w3b0,w4c0,...
Ra0(10),w2b0,Rb0(10),w2c0,Rc0(10),w3b0,w4c0,...
w2d0,Omegad0]; %Initial conditions

options=odeset('RelTol',1e-10);
tspan=0:60:TIME;
[t,y] = ode15s(@odesystem,tspan,y0,options); %ODEs solver

%Results
%Domain A
Ra=[y(:,1),y(:,8),y(:,15),y(:,22),y(:,29),y(:,36),y(:,43),y(:,50),y(:,57),y(:,64)];
%Domain B
w2b=[y(:,2),y(:,9),y(:,16),y(:,23),y(:,30),y(:,37),y(:,44),y(:,51),y(:,58),y(:,65)];
w3b=[y(:,6),y(:,13),y(:,20),y(:,27),y(:,34),y(:,41),y(:,48),y(:,55),y(:,62),y(:,69)];
w1b=1-w3b-w2b;
Rb=[y(:,3),y(:,10),y(:,17),y(:,24),y(:,31),y(:,38),y(:,45),y(:,52),y(:,59),y(:,66)];
rhob=((1-w2b-w3b)/rho10+w2b/rho20+w3b/rho30).^(-1);
%Domain C
w2c=[y(:,4),y(:,11),y(:,18),y(:,25),y(:,32),y(:,39),y(:,46),y(:,53),y(:,60),y(:,67)];
w4c=[y(:,7),y(:,14),y(:,21),y(:,28),y(:,35),y(:,42),y(:,49),y(:,56),y(:,63),y(:,70)];

```



$Np(9)*w2c(:,9).*rhoc(:,9).(Rc(:,9).^3-Rb(:,9).^3)+...$   
 $Np(10)*w2c(:,10).*rhoc(:,10).(Rc(:,10).^3-Rb(:,10).^3));$

%/////////Release from the ith class/////////

$m201=4/3*pi*rhoa*w2a0*(Np(1)*(Ra0(1)^3-R0(1)^3));$   
 $m2a1=4/3*pi*rhoa*w2a0*(Np(1)*(Ra(:,1).^3-R0(1).^3));$   
 $m2b1=4/3*pi*(Np(1).*w2b(:,1).*rhob(:,1).(Rb(:,1).^3-Ra(:,1).^3));$   
 $m2c1=4/3*pi*(Np(1)*w2c(:,1).*rhoc(:,1).(Rc(:,1).^3-Rb(:,1).^3));$   
 $release1=(m201-(m2a1+m2b1+m2c1))/m201;$

$m202=4/3*pi*rhoa*w2a0*(Np(2)*(Ra0(2)^3-R0(2)^3));$   
 $m2a2=4/3*pi*rhoa*w2a0*(Np(2)*(Ra(:,2).^3-R0(2).^3));$   
 $m2b2=4/3*pi*(Np(2).*w2b(:,2).*rhob(:,2).(Rb(:,2).^3-Ra(:,2).^3));$   
 $m2c2=4/3*pi*(Np(2)*w2c(:,2).*rhoc(:,2).(Rc(:,2).^3-Rb(:,2).^3));$   
 $release2=(m202-(m2a2+m2b2+m2c2))/m202;$

$m203=4/3*pi*rhoa*w2a0*(Np(3)*(Ra0(3)^3-R0(3)^3));$   
 $m2a3=4/3*pi*rhoa*w2a0*(Np(3)*(Ra(:,3).^3-R0(3).^3));$   
 $m2b3=4/3*pi*(Np(3).*w2b(:,3).*rhob(:,3).(Rb(:,3).^3-Ra(:,3).^3));$   
 $m2c3=4/3*pi*(Np(3)*w2c(:,3).*rhoc(:,3).(Rc(:,3).^3-Rb(:,3).^3));$   
 $release3=(m203-(m2a3+m2b3+m2c3))/m203;$

$m204=4/3*pi*rhoa*w2a0*(Np(4)*(Ra0(4)^3-R0(4)^3));$   
 $m2a4=4/3*pi*rhoa*w2a0*(Np(4)*(Ra(:,4).^3-R0(4).^3));$   
 $m2b4=4/3*pi*(Np(4).*w2b(:,4).*rhob(:,4).(Rb(:,4).^3-Ra(:,4).^3));$   
 $m2c4=4/3*pi*(Np(4)*w2c(:,4).*rhoc(:,4).(Rc(:,4).^3-Rb(:,4).^3));$   
 $release4=(m204-(m2a4+m2b4+m2c4))/m204;$

$m205=4/3*pi*rhoa*w2a0*(Np(5)*(Ra0(5)^3-R0(5)^3));$   
 $m2a5=4/3*pi*rhoa*w2a0*(Np(5)*(Ra(:,5).^3-R0(5).^3));$   
 $m2b5=4/3*pi*(Np(5).*w2b(:,5).*rhob(:,5).(Rb(:,5).^3-Ra(:,5).^3));$   
 $m2c5=4/3*pi*(Np(5)*w2c(:,5).*rhoc(:,5).(Rc(:,5).^3-Rb(:,5).^3));$   
 $release5=(m205-(m2a5+m2b5+m2c5))/m205;$

$m206=4/3*pi*rhoa*w2a0*(Np(6)*(Ra0(6)^3-R0(6)^3));$   
 $m2a6=4/3*pi*rhoa*w2a0*(Np(6)*(Ra(:,6).^3-R0(6).^3));$   
 $m2b6=4/3*pi*(Np(6).*w2b(:,6).*rhob(:,6).(Rb(:,6).^3-Ra(:,6).^3));$   
 $m2c6=4/3*pi*(Np(6)*w2c(:,6).*rhoc(:,6).(Rc(:,6).^3-Rb(:,6).^3));$   
 $release6=(m206-(m2a6+m2b6+m2c6))/m206;$

$m207=4/3*pi*rhoa*w2a0*(Np(7)*(Ra0(7)^3-R0(7)^3));$   
 $m2a7=4/3*pi*rhoa*w2a0*(Np(7)*(Ra(:,7).^3-R0(7).^3));$   
 $m2b7=4/3*pi*(Np(7).*w2b(:,7).*rhob(:,7).(Rb(:,7).^3-Ra(:,7).^3));$   
 $m2c7=4/3*pi*(Np(7)*w2c(:,7).*rhoc(:,7).(Rc(:,7).^3-Rb(:,7).^3));$   
 $release7=(m207-(m2a7+m2b7+m2c7))/m207;$

$m208=4/3*pi*rhoa*w2a0*(Np(8)*(Ra0(8)^3-R0(8)^3));$   
 $m2a8=4/3*pi*rhoa*w2a0*(Np(8)*(Ra(:,8).^3-R0(8).^3));$   
 $m2b8=4/3*pi*(Np(8).*w2b(:,8).*rhob(:,8).(Rb(:,8).^3-Ra(:,8).^3));$   
 $m2c8=4/3*pi*(Np(8)*w2c(:,8).*rhoc(:,8).(Rc(:,8).^3-Rb(:,8).^3));$   
 $release8=(m208-(m2a8+m2b8+m2c8))/m208;$

$m209=4/3*pi*rhoa*w2a0*(Np(9)*(Ra0(9)^3-R0(9)^3));$   
 $m2a9=4/3*pi*rhoa*w2a0*(Np(9)*(Ra(:,9).^3-R0(9).^3));$   
 $m2b9=4/3*pi*(Np(9).*w2b(:,9).*rhob(:,9).(Rb(:,9).^3-Ra(:,9).^3));$   
 $m2c9=4/3*pi*(Np(9)*w2c(:,9).*rhoc(:,9).(Rc(:,9).^3-Rb(:,9).^3));$   
 $release9=(m209-(m2a9+m2b9+m2c9))/m209;$

$m2010=4/3*pi*rhoa*w2a0*(Np(10)*(Ra0(10)^3-R0(10)^3));$



legend('Exp 20um','Exp 30um','Exp 60um','Mod')

%//////////End Figures//////////

end

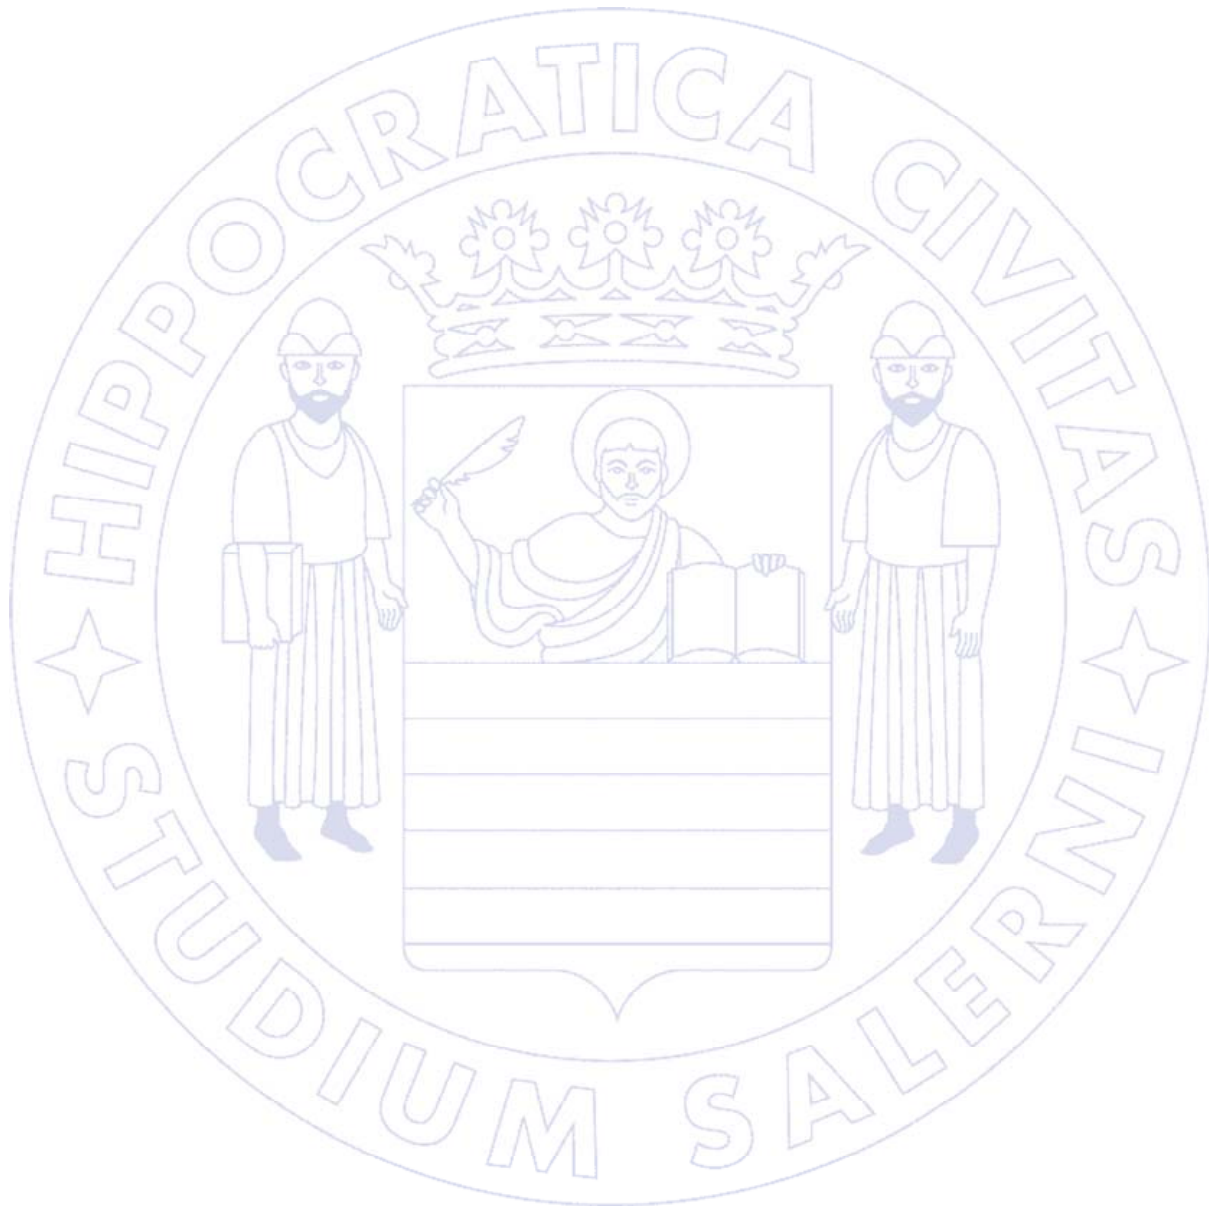

Supplement: BPH-174-1797-s001.pdf [file BPH-174-1797-s001.pdf]
